# Supplementary material for: Construction of a Bivalent Thrombin Binding Aptamer and Its Antidote with Improved Properties
Source: PubMed Central journal article supplement (PMC6151750; doi:10.3390/molecules22101770), 2017-10-19
Supplement: molecules-22-01770-s001.pdf [file molecules-22-01770-s001.pdf]

# Construction of a bivalent thrombin binding aptamer and its antidote with improved properties.

Quintin W. Hughes <sup>1,2\*</sup>, Bao T. Le <sup>3,4</sup>, Grace Gilmore <sup>1,2</sup>, Ross I. Baker <sup>1,2</sup> and Rakesh N. Veedu <sup>3,4\*</sup>

<sup>1</sup> Western Australian Centre for Thrombosis and Haemostasis, Discovery Way, Murdoch University, Perth, WA 6150, Australia.

<sup>2</sup> Perth Blood Institute, Hollywood Private Hospital, Monash Avenue, Perth, WA 6009, Australia.

<sup>3</sup> Centre for Comparative Genomics, Discovery Way, Murdoch University, Perth, WA 6150, Australia.

<sup>4</sup> Perron Institute for Neurological and Translational Science, Perth, WA 6009, Australia.

\* Correspondence: [R.Veedu@murdoch.edu.au](mailto:R.Veedu@murdoch.edu.au); [q.hughes@wacth.org](mailto:q.hughes@wacth.org); Tel.: +61-8-9360-2803

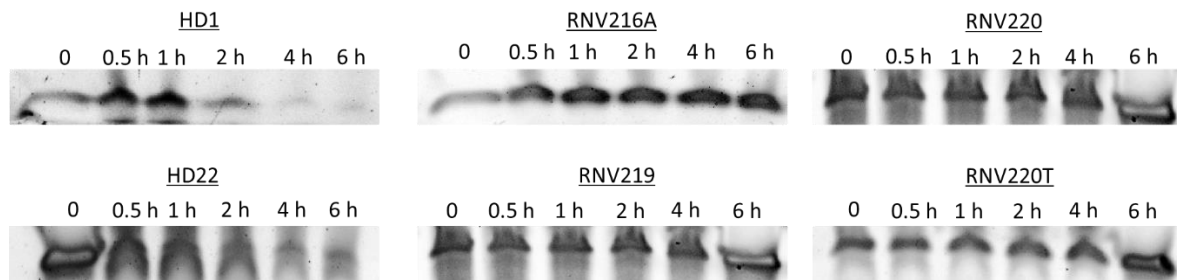

**Figure S1.** Human serum degradation assay of the aptamers used in this study. (h = hour).
